# Supplementary material for: Predicting the chemical composition of biocrude from hydrothermal liquefaction of biomasses using a multivariate statistical approach
Source: Royal Society of Chemistry journal article supplement (doi:10.1039/d4se00860j), 2024-01-01
Supplement: d4se00860j1.pdf [file d4se00860j1.pdf]

## Supplementary material

### Predicting the chemical composition of biocrude from hydrothermal liquefaction of biomasses with a multivariate statistical approach

Maja Skou Jensen, René Bjerregaard Madsen, Daniil Salionov and Marianne Glasius

Department of Chemistry, Aarhus University, Langelandsgade 140, 8000 Aarhus C, Denmark

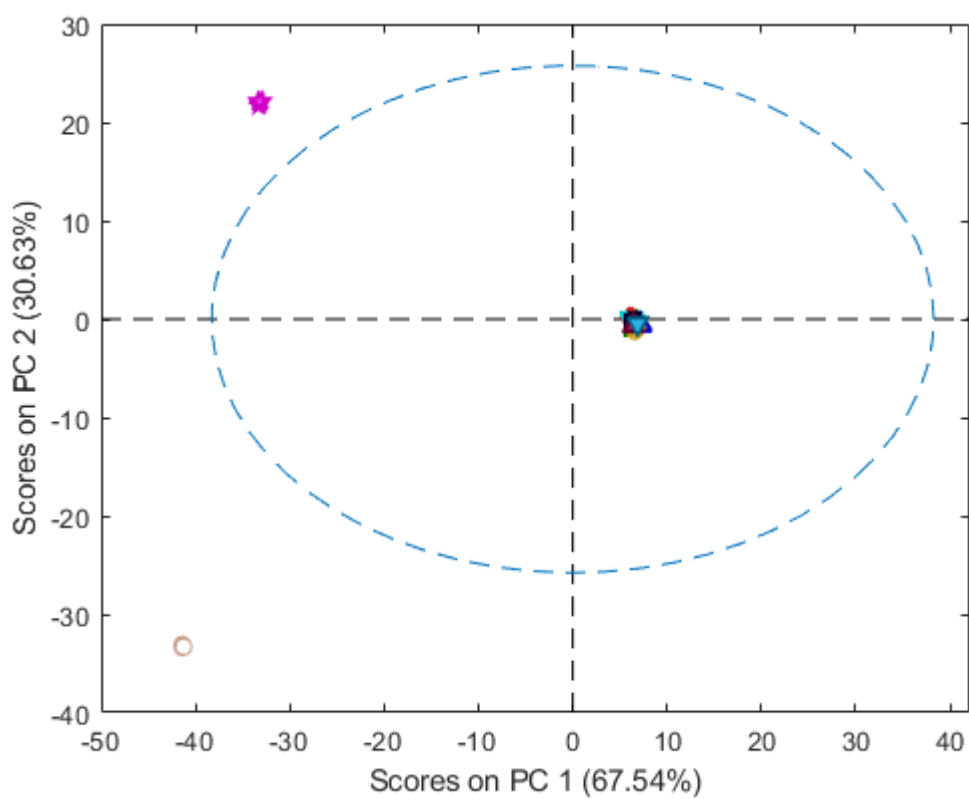

Figure S1. PCA of QC samples (pink star) and blank samples (white dot) and biocrude samples.

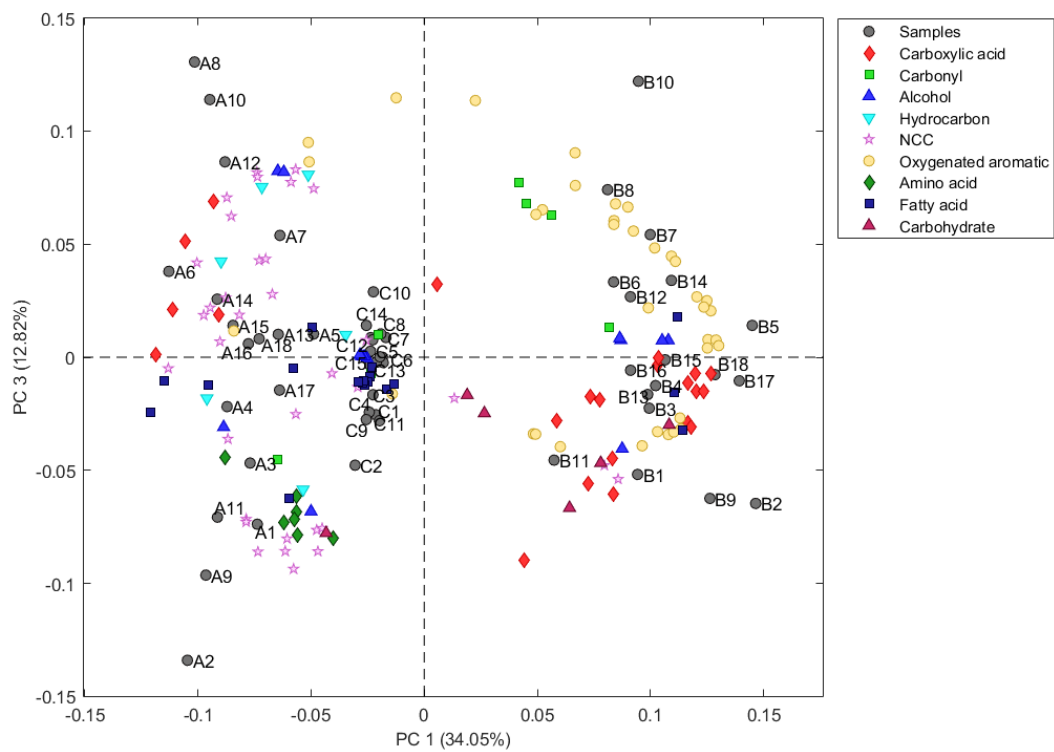

Figure S2. PCA of results from analysis of biocrude from HTL of *Spirulina*, *Miscanthus* and sewage sludge. PC3 separates samples based on process conditions.

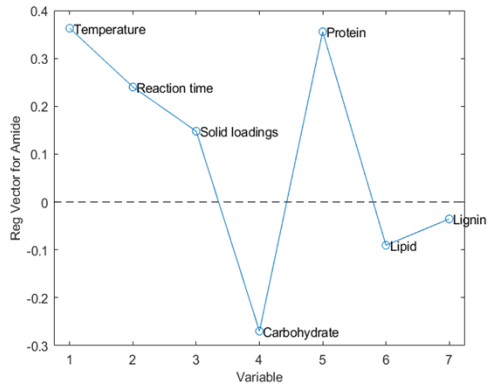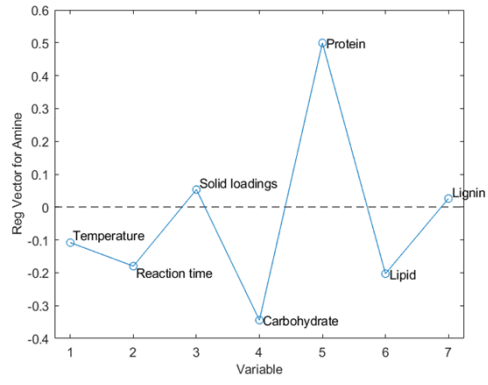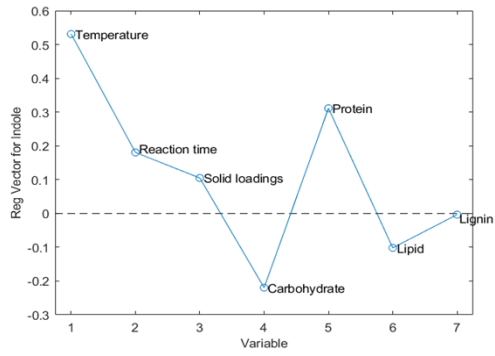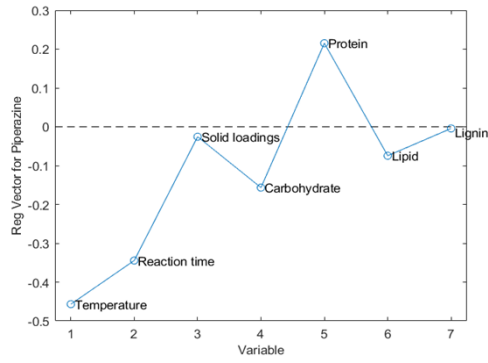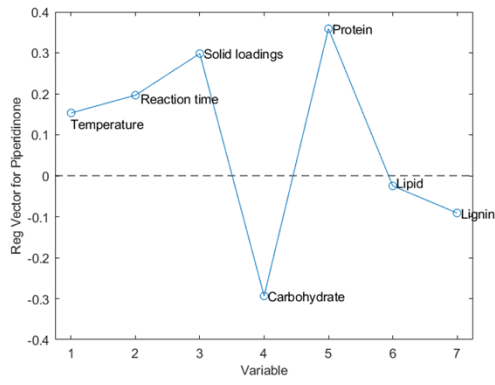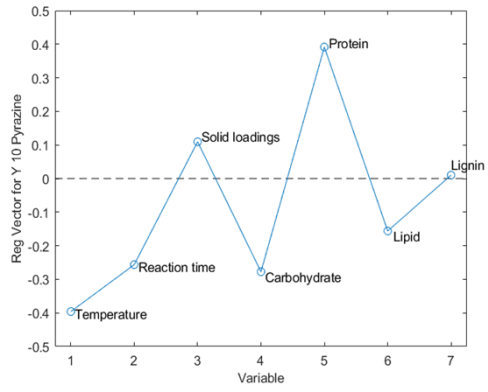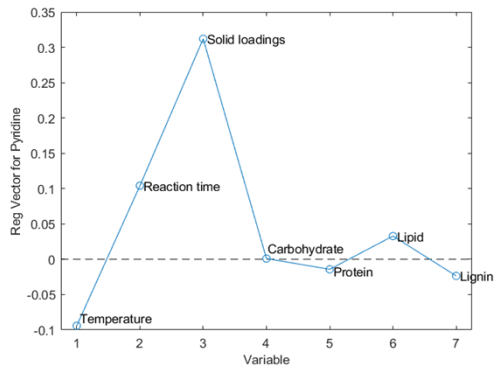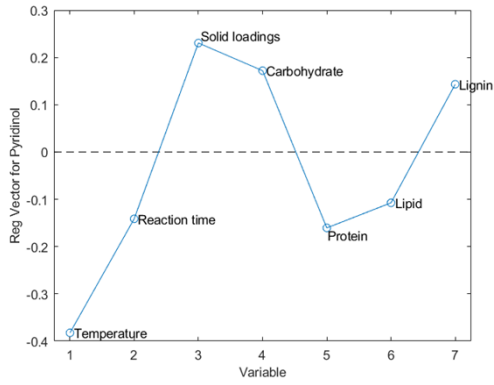

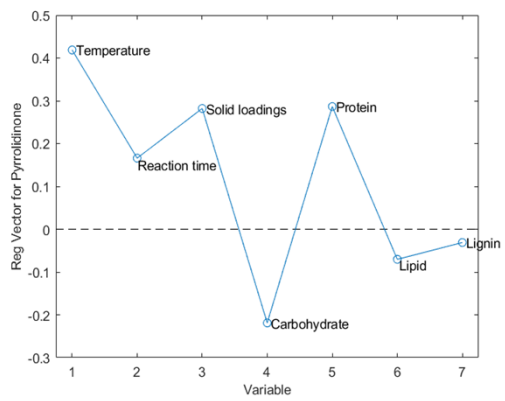

Figure S3. Regression vectors of different types of NCCs (nitrogen-containing compounds).

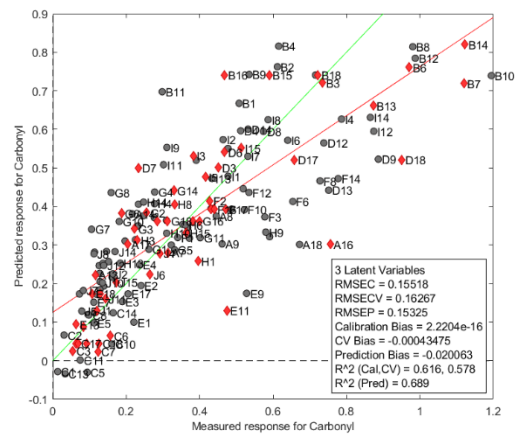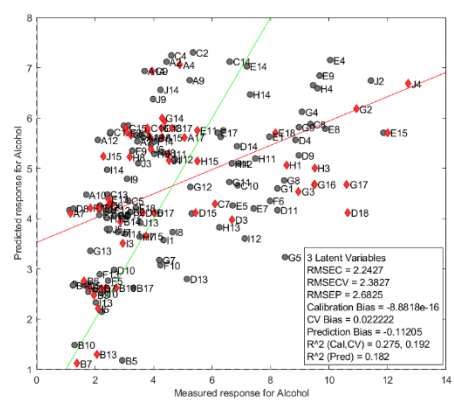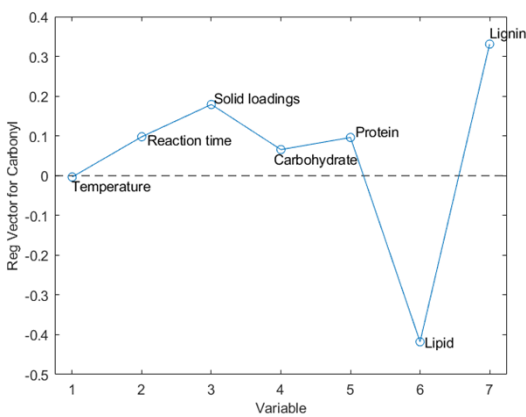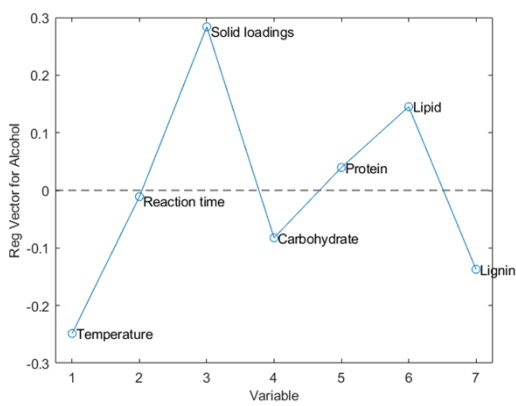

Figure S4. PLS-R of alcohols and carbonyl compounds.
